# Supplementary material
Source: PubMed Central journal article supplement (PMC7053839)
Supplement: 10.1194_M094540_jlr.M094540-1.pdf [file 10.1194_M094540_jlr.M094540-1.pdf]

**Supplemental material to:**

**Nonsynonymous SNPs in *LPA* homologous to plasminogen deficiency mutants represent novel null apo(a) alleles**

Benjamin M. Morgan<sup>1</sup>, Aimee N. Brown<sup>1</sup>, Nikita Deo<sup>1,2</sup>, Tom W.R. Harrop<sup>1</sup>, George Taiaroa<sup>1</sup>, Peter D. Mace<sup>1,2</sup>, Sigurd M. Wilbanks<sup>1</sup>, Tony R. Merriman<sup>1,2</sup>, Michael J.A. Williams<sup>3</sup> and Sally P.A. McCormick<sup>1,2\*</sup>

<sup>1</sup>Department of Biochemistry, School of Biomedical Sciences, University of Otago, Dunedin, New Zealand.

<sup>2</sup> Maurice Wilkins Centre for Molecular Biodiscovery, Private Bag 92019, Auckland 1142, New Zealand.

<sup>3</sup>Department of Medicine, Dunedin School of Medicine, University of Otago, Dunedin, New Zealand.

\* To whom correspondence should be addressed: Sally McCormick, Department of Biochemistry, University of Otago, 710 Cumberland Street, Dunedin 9016, New Zealand.  
Phone: (64 3) 479 7840; Fax: (64 3) 479 7866; E-mail: [sally.mccormick@otago.ac.nz](mailto:sally.mccormick@otago.ac.nz)

## **Supplemental methods**

### **Bioinformatic Analysis**

The paired end read pools were exported and demultiplexed into sample pools using Illumina bcl2fastq script, which separates reads using the unique Illumina identification index and then into sample amplicon pools. A custom in-house script was used to remove Illumina index sequences from the end of reads. The script simultaneously removed bases with low quality call scores ( $<0.99$ ) from the ends of reads and discarded significantly shortened reads. The remainder of the bioinformatics analysis was performed in Geneious (1). Paired-end reads were matched and then merged using FLASH (2). Sample amplicon pools were mapped directly onto each amplicon reference sequence, as derived from the NCBI *LPA* gene reference sequence DQ452068. When mapping to KIV-2, the 'reference' sequence was derived from the first KIV-2 repeat. Standard variant calling was performed for single copy regions of *LPA*. Reads encompassing KIV-2 underwent a MUSCLE (3) alignment before variant calling. This grouped reads based on sequence similarity, aiding in the calling of low frequency variants. Variants were called down to a frequency of 0.01 to allow theoretical calling of a SNP present in a single repeat within a sample carrying the maximum number of 80 repeats.

### **Nomenclature of Variants**

The SNPs in the non-repeat kringle domains were assigned numbering based on the *LPA* reference sequence DQ452068 and the corresponding protein sequence NP\_005568 which contain six KIV-2 repeats. Bases are given according to the reverse strand, which is the coding strand of *LPA*. With respect to the KIV-2 repeat, the numbering scheme previously used by Coassin et al (4) was employed in this study, which numbers variants from the first amino acid that is fully encoded by exon 1 of the first KIV-2 repeat.

## Supplemental tables

**Supplemental Table S1: Demographic information for the Otago LPA population**

| Variable                         |             |
|----------------------------------|-------------|
| n                                | 705         |
| Europeans                        | 89%*        |
| % male                           | 39%         |
| Age (mean, years)                | 46.5 (19)   |
| Heart disease (%)                | 7.5% (96%)  |
| Diabetes (%)                     | 2.7% (79%)  |
| Hypertension (%)                 | 16.5% (89%) |
| Dyslipidemia, (%)                | 32% (70%)   |
| Total cholesterol (mean, mmol/L) | 5.03 (1.16) |
| HDL cholesterol (mean, mmol/L)   | 1.58 (0.43) |
| LDL cholesterol (mean, mmol/L)   | 2.95 (1.01) |
| Lp(a), (median, mg/dL)           | 14.6 (40)   |
| Lp(a), <3 mg/dL, n               | 79          |
| Lp(a), 3-50 mg/dL, n             | 435         |
| Lp(a), >50 mg/dL, n              | 191         |

Numbers in brackets indicate standard deviation, except in the case of the 4 disease categories in which case they represent the percentage of individuals on medication. The most common medications being used were statins, aspirin and  $\beta$ -blockers for heart disease; aspirin, ACE inhibitors, metformin and statins for diabetes; ACE inhibitors, statins and aspirin for hypertension and statins, aspirin and ACE inhibitors for dyslipidemia.

\*The remaining 11% consisted of mainly Asian and Maori ethnicity.

**Supplemental Table S2: Selection criteria for null samples**

| <b>Population</b>                 | <b>LPA</b> | <b>GOUT</b> |
|-----------------------------------|------------|-------------|
| Size (n)                          | 705        | 288         |
| <b>Selection Criteria</b>         |            |             |
| 1. Lp(a) <3 mg/dL (n)             | 79         | 51          |
| 2. Null on apo(a) phenotyping (n) | 21         | 6           |
| NGS sequenced (n)                 | 5          | 6           |
| 3. SNPs associated with low Lp(a) | 2          | 4           |

**Supplemental Table S3: Primer sequences for R1771C apo(a)-GFP vector mutagenesis and apo(a) qPCR analysis**

| <b>Primer name</b>    | <b>Sequence 5'-3'</b>                                    | <b>T<sub>m</sub> C°</b> |
|-----------------------|----------------------------------------------------------|-------------------------|
| R1771C Forward        | GGT CTG GAA AAA AAT TAC TGC TGT AAC CCT GAT<br>GGT GAC A | 60                      |
| R1771C Reverse        | TGT CAC CAT CAG GGT TAC AGC AGT AAT TTT TTT<br>CCA GAC C | 60                      |
| Exon 33/34<br>Forward | TGA CAT CAA TGG TCC CTG GTG                              | 49                      |
| Exon 33/34<br>Reverse | ACT TGA GGC TTC CCA CAA TCA                              | 47                      |
| Neo Forward           | TCC GGT GCC CTG AAT GAA CT                               | 49                      |
| Neo Reverse           | TAC TTT CTC GGC AGG AGC AA                               | 47                      |

**Supplemental Table S4: R1771C mutagenesis protocol**

| <b>Reagent</b>              |                  | <b>Concentration</b>      |          |
|-----------------------------|------------------|---------------------------|----------|
| dNTPs                       |                  | 300 $\mu$ M               |          |
| Primer (F/R)                |                  | 0.1 $\mu$ M (each primer) |          |
| DNA                         |                  | 75 ng                     |          |
| Pfu 10x Buffer              |                  | 1x                        |          |
| Pfu polymerase              |                  | 3U                        |          |
| RNase-free H <sub>2</sub> O |                  | 20 $\mu$ L final vol.     |          |
| <b>Cycling conditions</b>   |                  |                           |          |
| Step                        | Temperature (C°) | Duration                  | n Cycles |
| Initial denaturation        | 95               | 2 minutes                 | 1        |
| Denaturation                | 95               | 40 seconds                |          |
| Annealing                   | 55               | 50 seconds                |          |
| Extension                   | 68               | 20 minutes                | 25       |
| Final extension             | 68               | 10 minutes                | 1        |

**Supplemental Table S5: Effect of rs41259144 on Lp(a) levels in previously published populations**

| SNP        | Gene           | cDNA          | Protein         | GMAF   | Cohort                                 | No.          | Ethnicity                         | MAF             | Effect                                                 | Significance         | Study                      |
|------------|----------------|---------------|-----------------|--------|----------------------------------------|--------------|-----------------------------------|-----------------|--------------------------------------------------------|----------------------|----------------------------|
| rs41259144 | g.7030<br>1G>A | c.2969G><br>A | p.Arg990<br>Gln | 0.0052 | EPIC<br>Norfolk<br>cohort              | 4101         | European                          | 0.01            | -35%(-49,-<br>21) <sup>a</sup>                         | 3.38E-05             | Erqou 2010 (5)             |
|            |                |               |                 |        | Colaas                                 | 6182         | Swiss<br>Caucasian                | 0.006-<br>0.012 | -0.94(0.203) <sup>b</sup>                              | 3.73E-06             | Mack et al.<br>2017 (6)    |
|            |                |               |                 |        | KORAF3                                 | 3076         | European<br>(Augsburg<br>Germany) |                 | -0.79(0.165) <sup>b</sup>                              | 2.02E-06             |                            |
|            |                |               |                 |        | KORAF4<br>YFS Study                    | 2926<br>2103 | Finnish                           |                 | -0.79(0.118) <sup>b</sup><br>-1.08(0.256) <sup>b</sup> | 2.35E-11<br>2.57E-05 |                            |
|            |                |               |                 |        | Single SNP Meta analysis               |              |                                   |                 | -0.85(0.084) <sup>b</sup>                              | 4.45E-24             |                            |
|            |                |               |                 |        | Joint SNP Meta analysis                |              |                                   |                 | -0.6(0.085) <sup>c</sup>                               | 2.01E-12             |                            |
|            |                |               |                 |        | FINRISK                                | 2690         | Finnish                           | 0.0068          | -0.57(0.0968) <sup>d</sup>                             | 3.95E-09             | Zekavat et al.<br>2018 (7) |
|            |                |               |                 |        | Copenhagen Heart<br>Study              |              |                                   | 0.011           | -12.8(1.2) <sup>e</sup>                                |                      | Burgess et al.<br>2018 (8) |
|            |                |               |                 |        | Copenhagen General<br>Population Study |              |                                   |                 | -9.6(0.8) <sup>f</sup>                                 |                      |                            |
|            |                |               |                 |        | EPIC-CVD<br>PROSPER<br>WOSCOPS         | 48333        | European                          |                 |                                                        | p<5E-08              |                            |

Gene= NG\_016147.1, cDNA=NM\_005577.2, Protein=NP\_005568.2, a=Effect on natural log-transformed Lp(a) (95%CI), b= $\beta$  inverse normal transformed Lp(a) (SE), c=  $\beta$  Inverse normal transformed Lp(a) adjusted for 49 additional independent SNPS (SE), d= $\beta$  Inverse-rank normalized Lp(a) conditional on KIV-2 CNV (SE), e=  $\beta$  Lp(a) mg/dL-1 (SE) marginal association, f= $\beta$  Lp(a) mg/dL-1 (SE) association conditional on all other variants in the published analysis.

**Supplemental Table S6: Effect of rs139145675 on Lp(a) levels in previously published populations**

| SNP         | Gene            | cDNA          | Protein          | GMAF                                | Cohort              | No.      | Ethnicity                                                | MAF     | Effect                    | Significance | Study                   |
|-------------|-----------------|---------------|------------------|-------------------------------------|---------------------|----------|----------------------------------------------------------|---------|---------------------------|--------------|-------------------------|
| rs139145675 | g.1258<br>49C>T | c.5311<br>C>T | p.Arg1771<br>Cys | 0.0044                              | Jackson Heart Study | 2895     | African American                                         | 0.00981 | -0.47(0.12) <sup>a</sup>  | 1.35E-04     | Li et al. 2015 (9)      |
|             |                 |               |                  |                                     | Jackson Heart Study | 3418     | African American                                         | 0.00971 | -1.12(0.117) <sup>b</sup> | 8.45E-22     | Zekavat et al. 2018 (7) |
|             |                 |               |                  |                                     |                     | 9272     | Lp(a) levels from JHS and and Finnish imputation dataset |         |                           |              |                         |
|             |                 |               |                  | Copenhagen Heart Study              |                     |          |                                                          | 0.001   | -8.6(3.7) <sup>c</sup>    |              | Burgess et al. 2018 (8) |
|             |                 |               |                  | Copenhagen General Population Study |                     |          |                                                          |         | -22.5(2.4) <sup>d</sup>   |              |                         |
|             |                 |               |                  | EPIC-CVD<br>PROSPER<br>WOSCOPS      | 48333               | European |                                                          |         |                           | p<5E-08      |                         |

Gene= NG\_016147.1, cDNA=NM\_005577.2, Protein=NP\_005568.2, a=β natural log-transformed Lp(a)(SE), b=β Inverse-rank normalized Lp(a) conditional on KIV-2 CNV (SE), c= β Lp(a) mg/dL-1 (SE) marginal association d=β Lp(a) mg/dL-1 (SE) association conditional on other variants in the published analysis.



**Supplemental Table S7: Effect of rs41272114 on Lp(a) levels in previously published populations**

| SNP                 | Gene           | cDNA                                                          | Protein      | GMAF                       | Cohort                   | No.                               | Ethnicity        | MAF         | Effect                      | Significance | Study                   |
|---------------------|----------------|---------------------------------------------------------------|--------------|----------------------------|--------------------------|-----------------------------------|------------------|-------------|-----------------------------|--------------|-------------------------|
| rs41272114          | g.8633<br>1G>A | c.4289<br>+1G>A                                               | +1<br>splice | 0.0234                     | EPIC Norfolk cohort      | 4050                              | European         | 0.035       | -26%(-35,-17) <sup>a</sup>  | 4.82E-07     | Erqou 2010 (5)          |
|                     |                |                                                               |              |                            | Jackson Heart Study      | 2895                              | African American | 0.0107      | -0.8(0.11) <sup>b</sup>     | 6.50E-12     | Li et al. 2015 (9)      |
|                     |                |                                                               |              |                            | Colaus                   | 6182                              | Swiss Caucasian  | 0.023-0.048 | -0.87(0.092) <sup>c</sup>   | 2.87E-21     | Mack et al. 2017 (6)    |
|                     |                |                                                               |              |                            | FamHS                    | 1200 families (~6000 individuals) |                  |             | -0.82(0.112) <sup>c</sup>   | 2.81E-13     |                         |
|                     |                |                                                               |              |                            | KORAF3                   | 3076                              | German           |             | -0.73(0.083) <sup>c</sup>   | 4.17E-18     |                         |
|                     |                |                                                               |              |                            | KORAF4                   | 2926                              | German           |             | -0.76(0.092) <sup>c</sup>   | 1.21E-16     |                         |
|                     |                |                                                               |              |                            | YFS Study                | 2103                              | Finnish          |             | -0.75(0.071) <sup>c</sup>   | 1.48E-25     |                         |
|                     |                |                                                               |              |                            | Single SNP Meta analysis |                                   |                  |             | -0.78(0.04) <sup>c</sup>    | 4.74E-86     |                         |
|                     |                |                                                               |              |                            | Joint SNP Meta analysis  |                                   |                  |             | -0.48(0.043) <sup>d</sup>   | 7.98E-29     |                         |
|                     |                |                                                               |              |                            | FINRISK                  | 2690                              | Finnish          | 0.0482      | -0.652(-0.037) <sup>e</sup> | 2.27E-69     | Zekavat et al. 2018 (7) |
| Jackson Heart Study | 3418           | African American                                              | 0.009        | -0.697(0.119) <sup>e</sup> | 4.49E-09                 |                                   |                  |             |                             |              |                         |
|                     |                | 9272 Lp(a) levels from JHS and and Finnish imputation dataset |              |                            |                          |                                   |                  |             |                             |              |                         |

Gene= NG\_016147.1, cDNA=NM\_005577.2, Protein=NP\_005568.2, a=Effect on natural log-transformed Lp(a) (95%CI), b= $\beta$  natural log-transformed Lp(a)(SE), c= $\beta$  inverse normal transformed Lp(a) (SE), d=  $\beta$  Inverse normal transformed Lp(a) adjusted for 49 additional independent SNPS (SE), e=  $\beta$  Inverse-rank normalized Lp(a).

**Supplemental Table S8. Individuals from LPA study population carrying R990Q mutation**

| <b>Participant</b> | <b>338</b> | <b>268</b> | <b>163</b> | <b>154</b> | <b>91</b> |
|--------------------|------------|------------|------------|------------|-----------|
| Age                | 54         | 51         | 63         | 66         | 47        |
| Sex                | F          | M          | F          | M          | F         |
| CVD                | No         | No         | No         | Yes        | Yes       |
| CVD-family history | No         | Yes        | Yes        | Yes        | Yes       |
| TC                 | 5.9        | 5.7        | 5.5        | 3.9        | 7.2       |
| TG                 | 1          | 1.5        | 0.7        | 0.9        | 1.1       |
| HDL-C              | 1.52       | 1.17       | 2.59       | 1.31       | 1.23      |
| LDL-C              | 3.9        | 3.9        | 2.6        | 2.2        | 5.5       |
| Lp(a)(mg/dL)       | 117        | 182        | 657        | 649        | 380       |
| Apo(a) phenotype   | 24/0       | 25/0       | 19/0       | 20/0       | 22/0      |

**Supplemental Table S9: qRT-PCR data for apo(a) exon 33/34 primer pair\***

| Sample                                                | Target ct | Mean ct     | Reference ct | Mean ct     | Tgtct-Refct ( $\Delta$ ct) |
|-------------------------------------------------------|-----------|-------------|--------------|-------------|----------------------------|
| WT01                                                  | 22.01     |             | 25.2         |             |                            |
| WT02                                                  | 21.94     |             | 25.2         |             |                            |
| WT03                                                  | 22.04     | 21.99666667 | 25.1         | 25.16666667 | -3.17                      |
| R1771C01                                              | 22.26     |             | 25.66        |             |                            |
| R1771C02                                              | 22.62     |             | 25.56        |             |                            |
| R1771C03                                              | 22.46     | 22.44666667 | 25.64        | 25.62       | -3.173333333               |
| $\Delta$ R1771Cct- $\Delta$ WTct ( $\Delta\Delta$ ct) |           |             |              |             | -0.003333333               |
| Fold change ( $2^{-\Delta\Delta$ ct)                  |           |             |              |             | 1.002313162                |

Samples are for three technical repeats using cDNA extracted from a single transfection experiment.

\* In order to target dissimilar regions of apo(a) and prevent amplification of multiple regions of sequence, primers were designed to bind to regions spanning the junction between exons 33 and 34 of the protease domain.

## Supplemental Figures

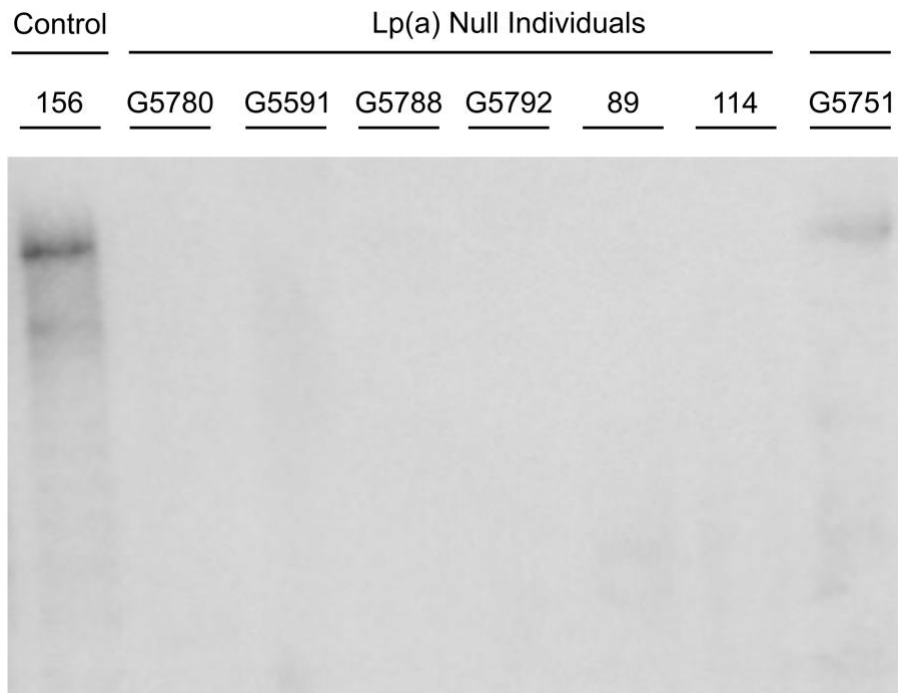

### Supplemental Fig. S1: Apo(a) phenotyping of individuals showing no detectable Lp(a).

Plasma from individuals with no detectable Lp(a) was mixed with reducing buffer and subject to electrophoresis on 4% polyacrylamide gels. Proteins were transferred overnight to nitrocellulose membrane and incubated with a polyclonal anti-Lp(a) antibody. Following incubation with a HRP-labelled secondary antibody, membranes were imaged using ECL. Lane 1 contains a sample that exhibits a single apo(a) isoform size of 21 and was loaded to 590 ng of Lp(a). Lanes 2-8 each contain 7.5  $\mu$ L of plasma samples from individuals classified as having an Lp(a) level of <3 mg/dL.

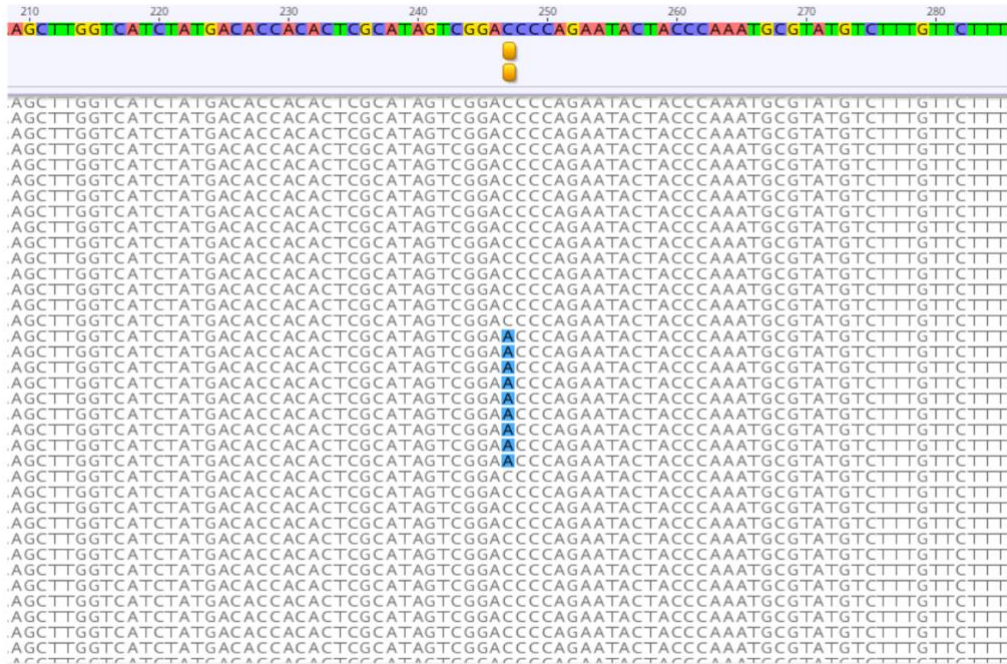

T46N (KIV-2)

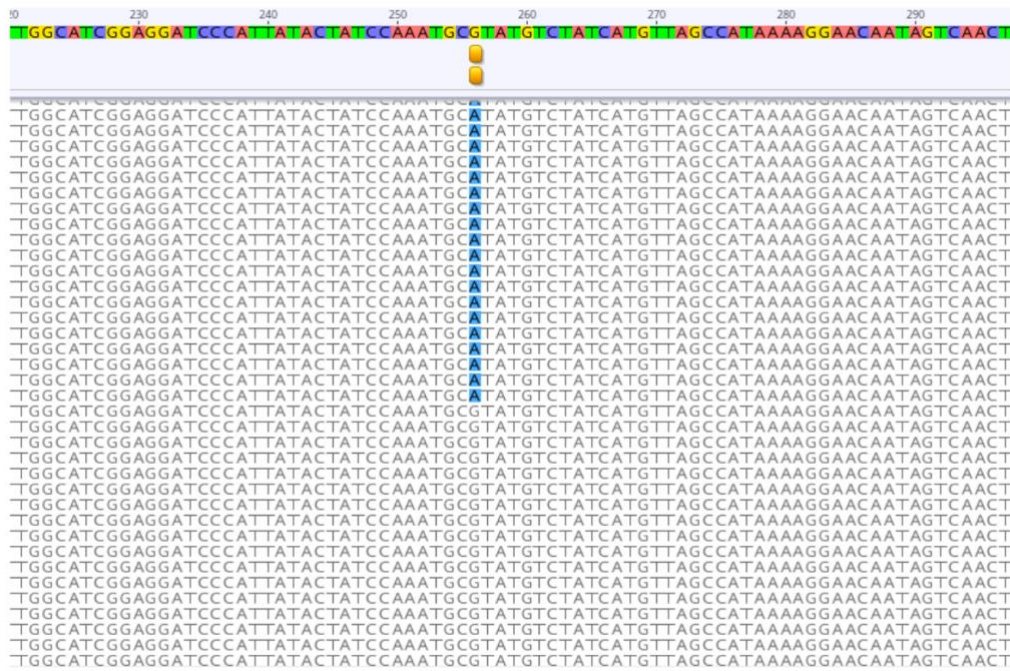

rs41272114 (KIV-8)

**Supplemental Fig. S2: NGS reads of nonsynonymous SNPs in *LPA* identified in subject G5788.**

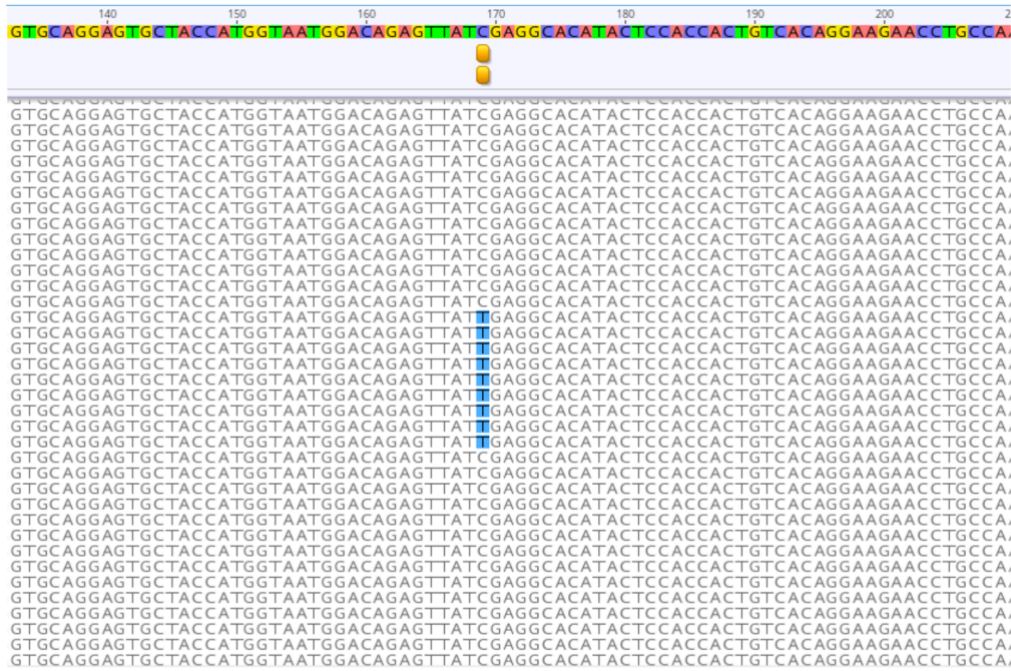

### R20X (KIV-2)

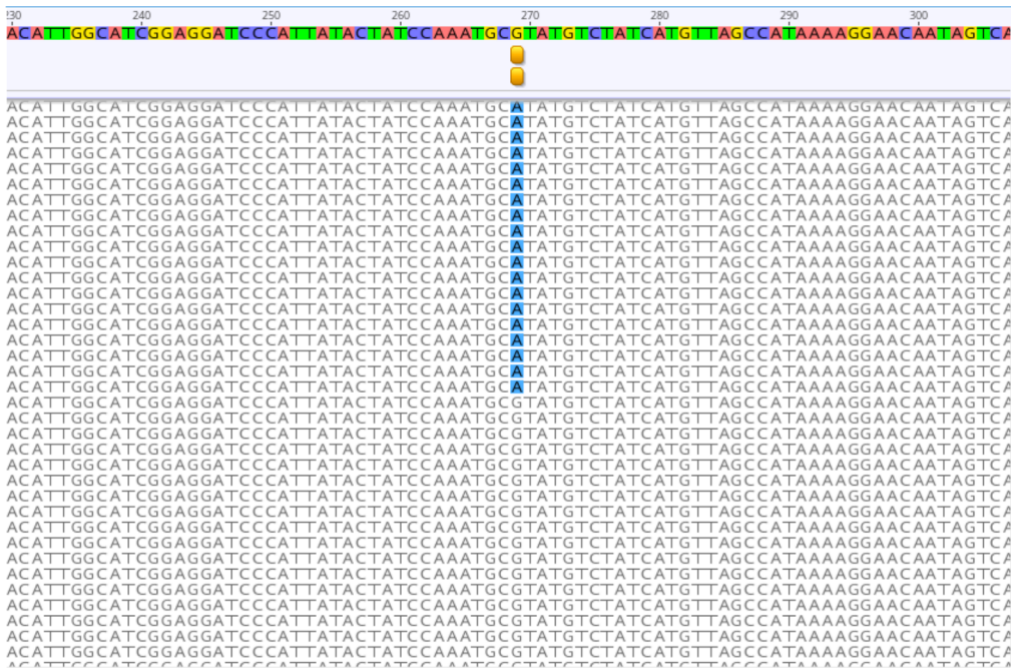

### rs41272114 (KIV-8)

**Supplemental Fig. S3: NGS reads of nonsynonymous SNPs in *LPA* identified in subject G5792.**



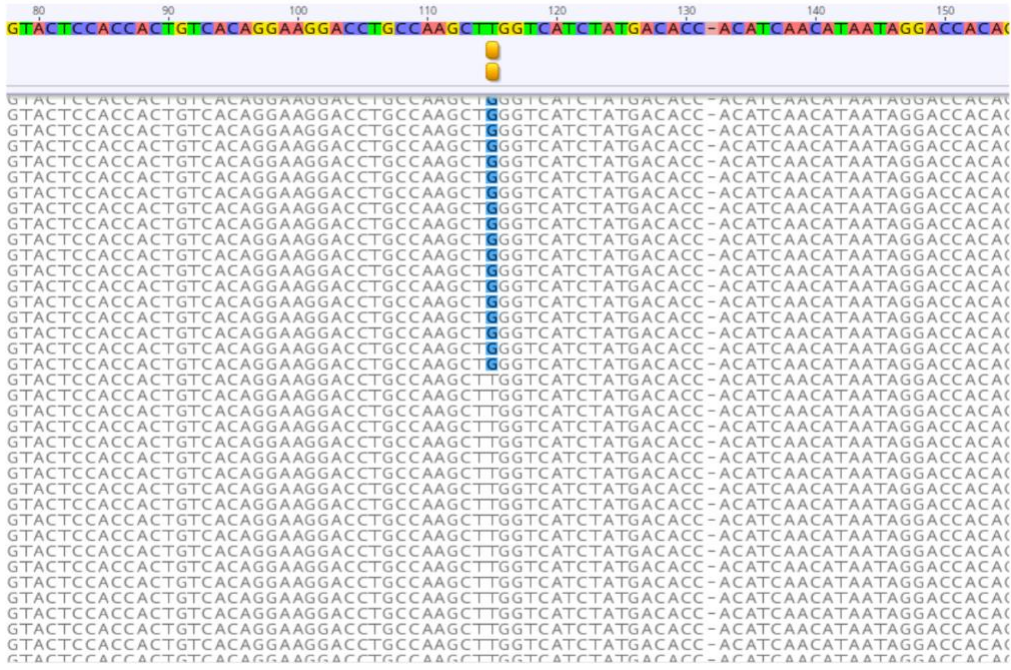

W52G (KIV-1)

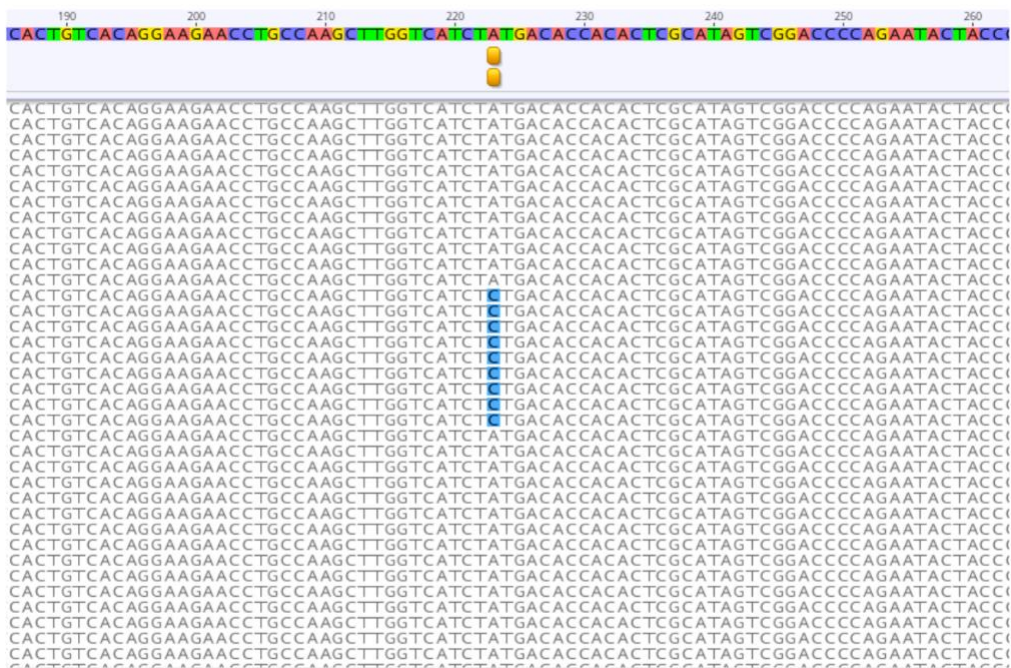

M38L (KIV-2)

Supplemental Fig. S5: NGS reads of nonsynonymous SNPs in *LPA* identified in subject G5780.



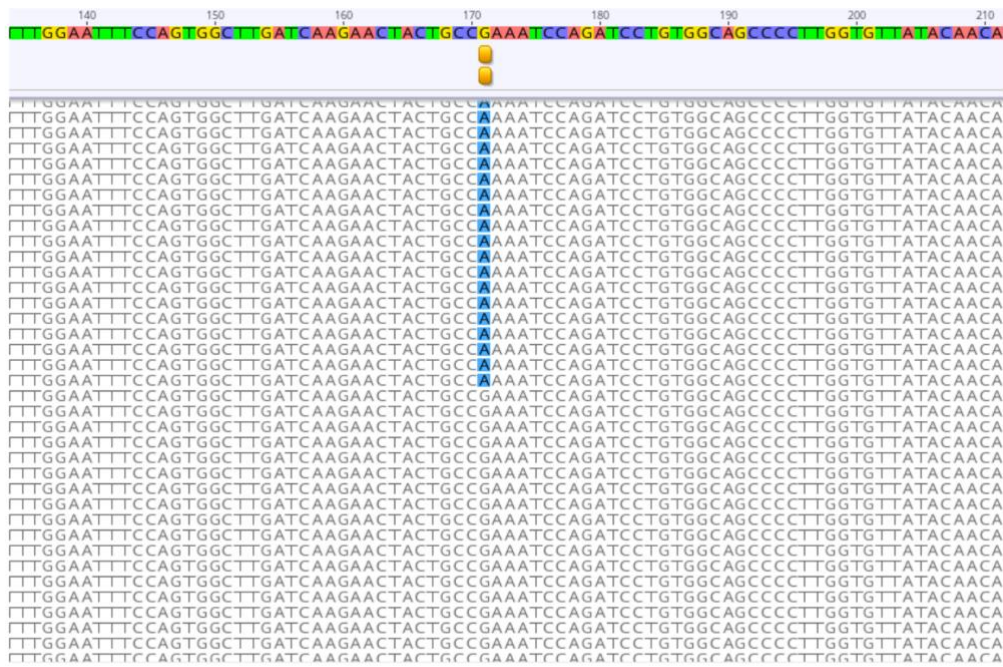

R990Q (KIV-4)

**Supplemental Fig. S5 (cont): NGS reads of nonsynonymous SNPs in *LPA* identified in subject G5780.**



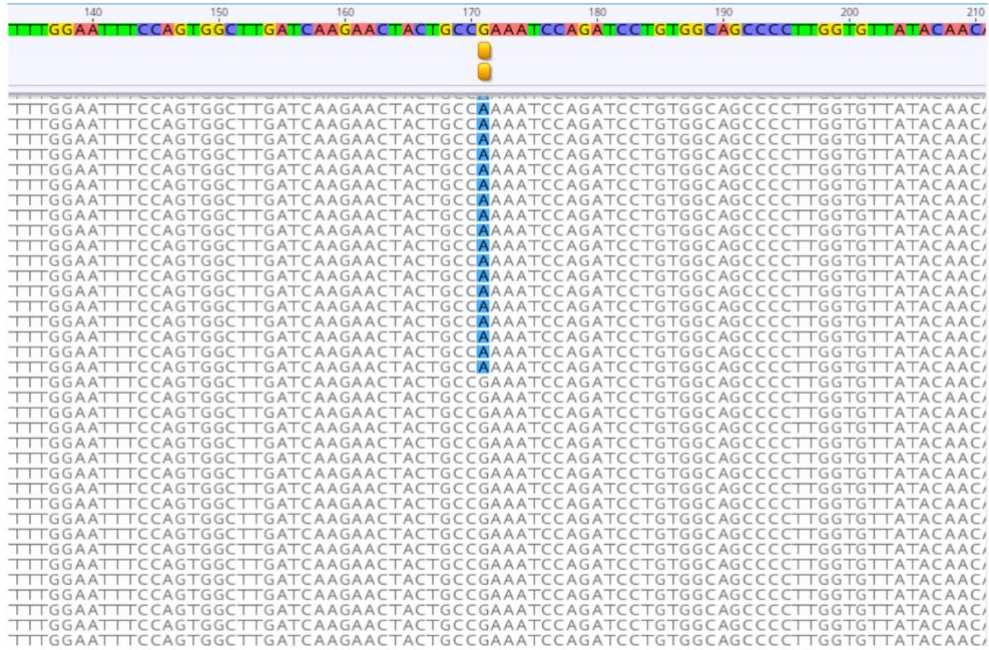

R990Q (KIV-4)

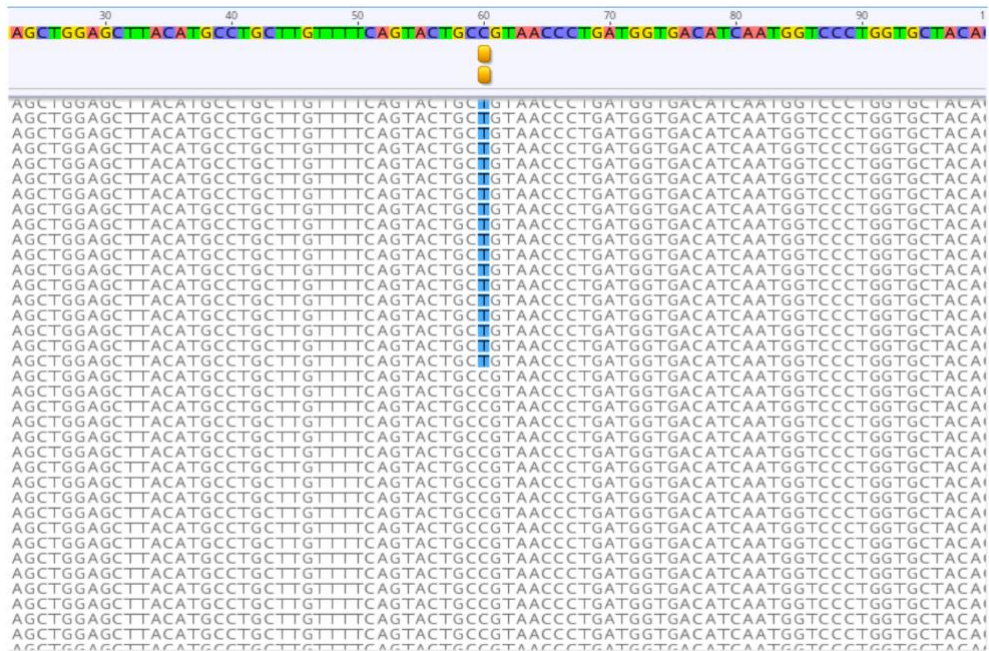

R1771C (KV)

Supplemental Fig. S7: NGS reads of nonsynonymous SNPs in *LPA* identified in subject LPA089.

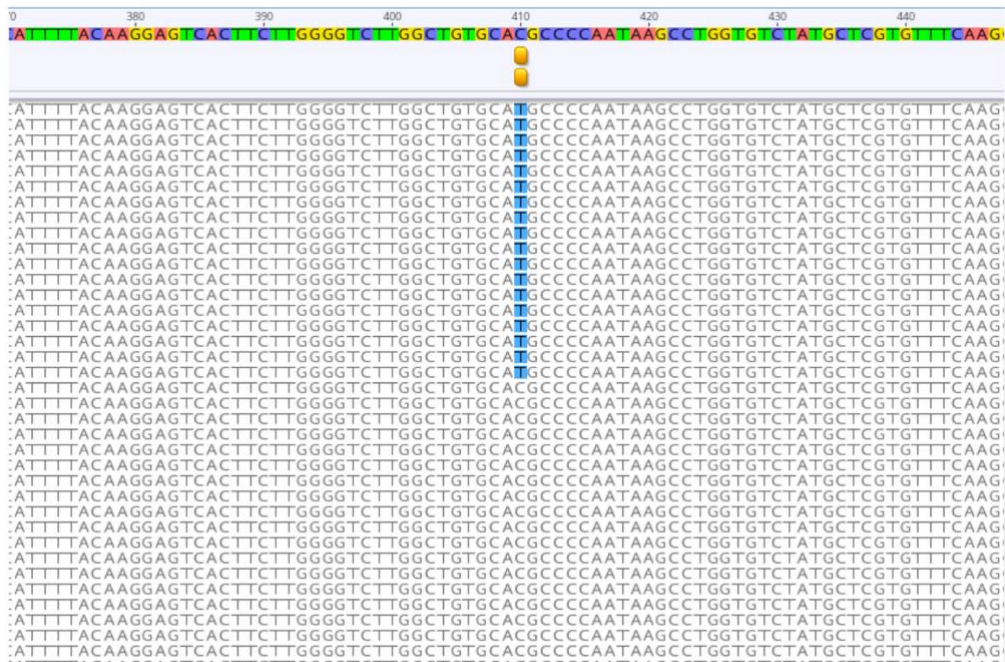

R2016C (Protease)

**Supplemental Fig. S7 (cont): NGS reads of nonsynonymous SNPs in *LPA* identified in subject LPA089.**

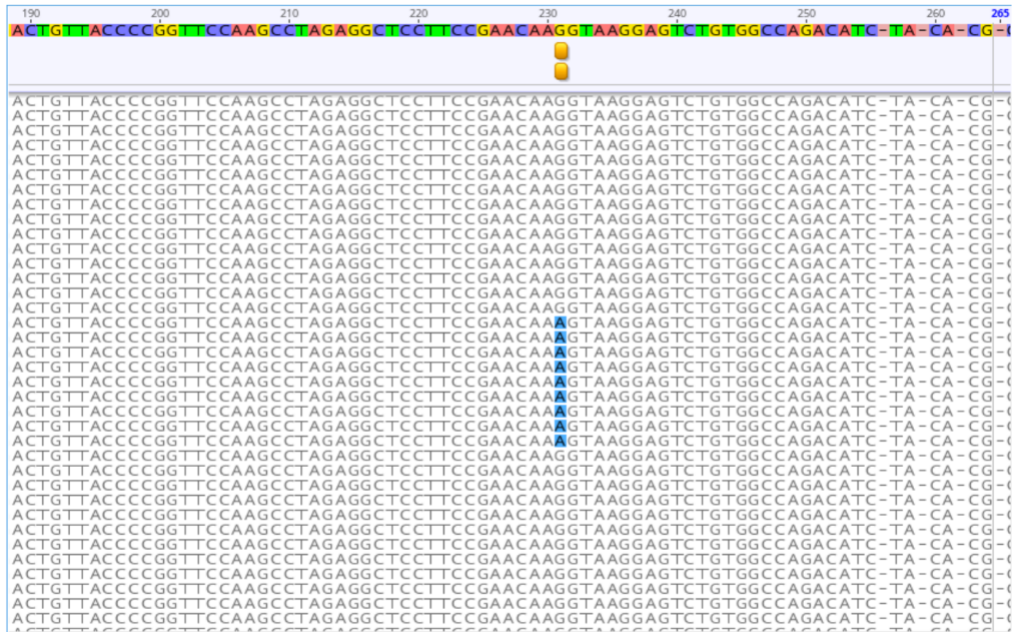

G4925A (KIV-2)

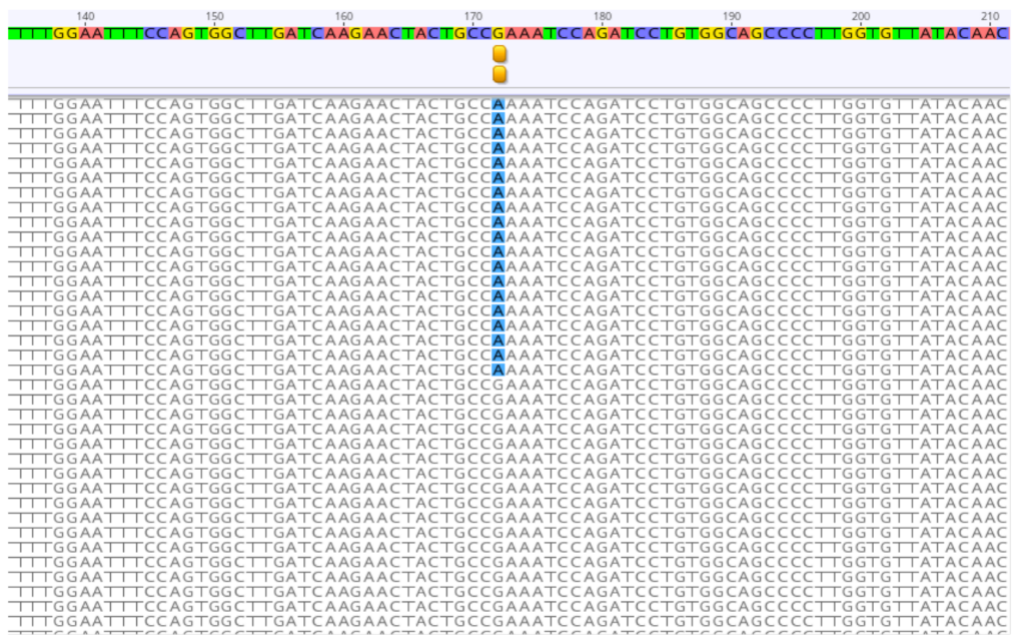

R990Q (KIV-4)

Supplemental Fig. S8: NGS reads of nonsynonymous SNPs in *LPA* identified in G5751.

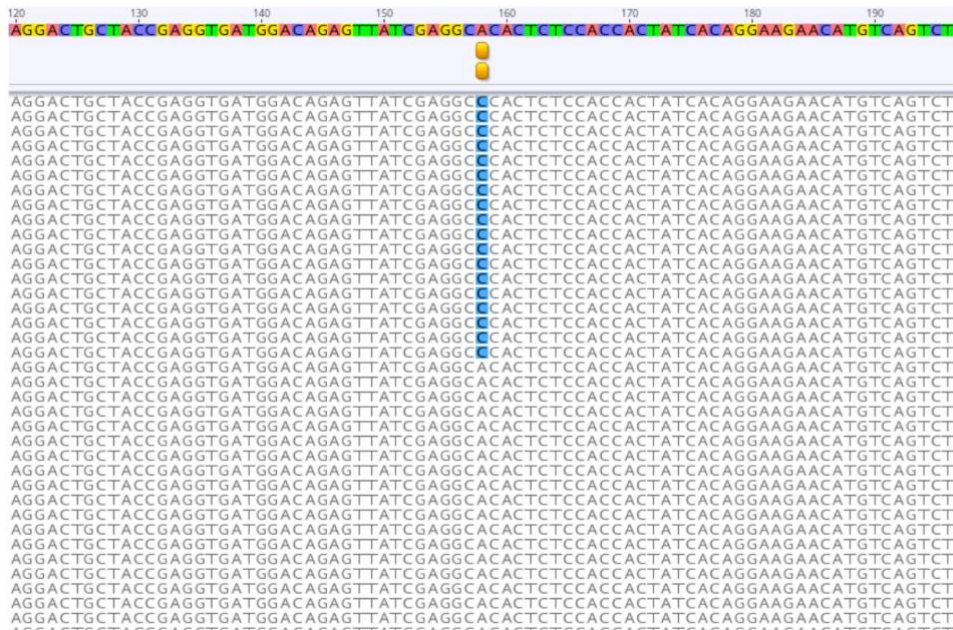

T1399P (KIV-8)

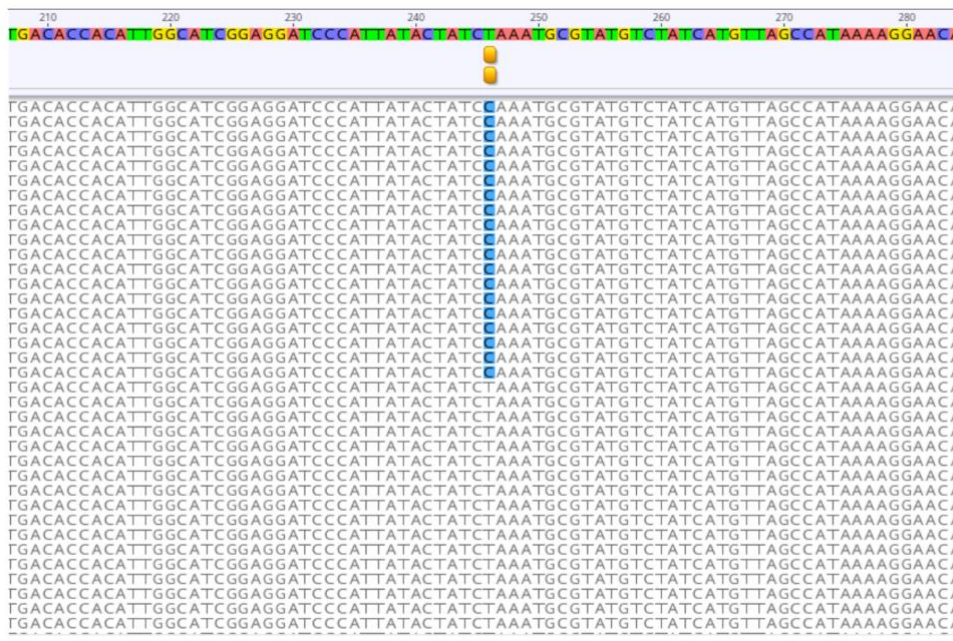

P1428L (KIV-8)

Supplemental Fig. S8 (cont): NGS reads of nonsynonymous *LPA* variants in subject G5751.

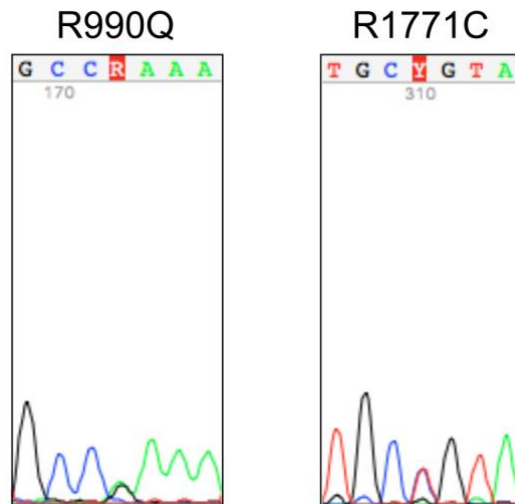

**Supplemental Fig. S9: Sanger sequencing traces of Subject LPA089 showing nonsynonymous R990Q and R1771C variants.**

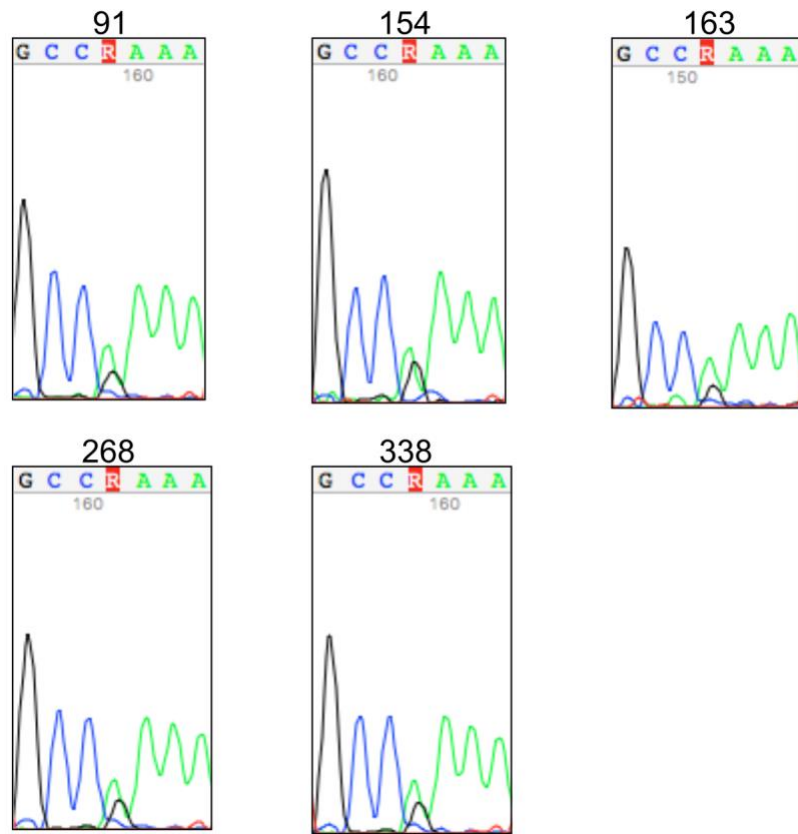

**Supplemental Fig. S10: Sanger sequencing traces of five LPA study individuals identified as carrying nonsynonymous R990Q SNP.**



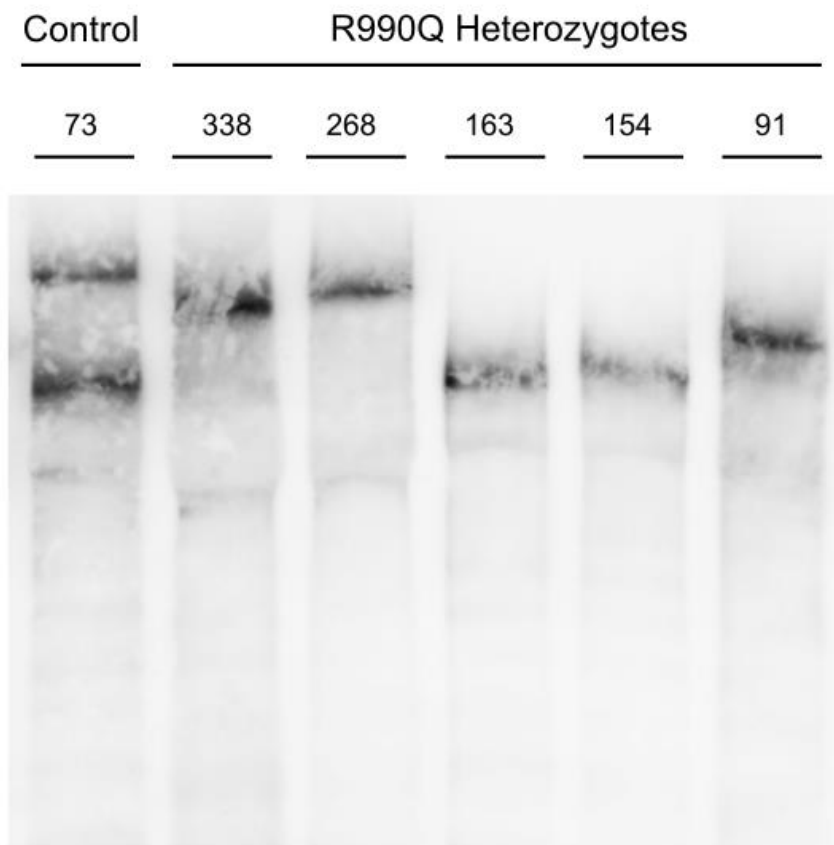

**Supplemental Fig. S11: Apo(a) phenotyping of individuals heterozygous for R990Q.**

Plasma from individuals confirmed heterozygous for R990Q by Sanger sequencing was mixed with reducing buffer and subject to electrophoresis on 4% polyacrylamide gels. Proteins were transferred overnight to nitrocellulose membrane and incubated with a polyclonal anti-Lp(a) antibody. Following incubation with a HRP-labelled secondary antibody, membranes were imaged using ECL. Lanes 1 contains a control sample that exhibits a apo(a) isoform sizes of 20 and 26 and was loaded to 575 ng. Lanes 2-6 contain samples from individuals heterozygous for R990Q loaded to an equivalent level of Lp(a) (500ng).

A

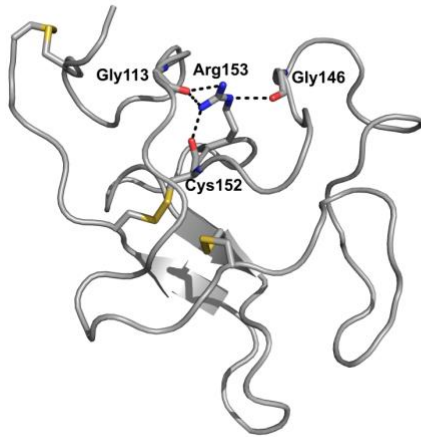

B

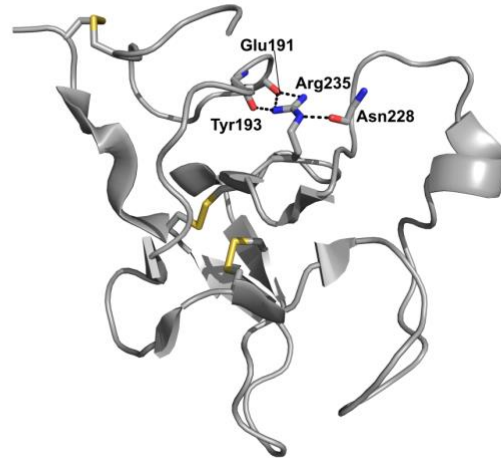

**Supplemental Fig. S12: Protein structures of KI and KII of plasminogen showing homologous arginine residues R153 and R235 respectively.** (A) The X-ray crystal structure of KI (PDB 4cik) shows the guanidinium sidechain of arginine residue 153 is positioned to interact once with the main chain carbonyl group of Gly146 in a 2.9Å contact, twice with the main chain carbonyl of Gly113 in 2.9Å and 3.0Å contacts, and once with the main chain carbonyl of Cys152 in a 2.6Å contact. (B) The NMR structure of KII (PDB 1b2i) shows the guanidinium sidechain of arginine residue 235 is positioned to interact once with the main chain carbonyl of Asn228 in a 2.7Å contact, once with the main chain carbonyl of Tyr193 in a 2.6Å contact and twice with the main chain carbonyl of Glu191 in two 2.6Å polar contacts.

## Supplemental references

1. Kearse, M., R. Moir, A. Wilson, S. Stones-Havas, M. Cheung, S. Sturrock, S. Buxton, A. Cooper, S. Markowitz, C. Duran, T. Thierer, B. Ashton, P. Meintjes, and A. Drummond. 2012. Geneious Basic: an integrated and extendable desktop software platform for the organization and analysis of sequence data. *Bioinformatics* **28**: 1647-1649.
2. Magoc, T., and S. L. Salzberg. 2011. FLASH: fast length adjustment of short reads to improve genome assemblies. *Bioinformatics* **27**: 2957-2963.
3. Edgar, R. C. 2004. MUSCLE: multiple sequence alignment with high accuracy and high throughput. *Nucleic Acids Res.* **32**: 1792-1797.
4. Coassin, S., S. Schonherr, H. Weissensteiner, G. Erhart, L. Forer, J. L. Losso, C. Lamina, M. Haun, G. Utermann, B. Paulweber, G. Specht, and F. Kronenberg. 2019. A comprehensive map of single-base polymorphisms in the hypervariable LPA kringle IV type 2 copy number variation region. *J. Lipid Res.* **60**: 186-199.
5. Erqou, S. (2010). Lipoprotein(a) and the risk of vascular disease (Doctoral thesis). <https://doi.org/10.17863/CAM.16247>
6. Mack, S., S. Coassin, R. Rueedi, N. A. Yousri, I. Seppala, C. Gieger, S. Schonherr, L. Forer, G. Erhart, P. Marques-Vidal, J. S. Ried, G. Waeber, S. Bergmann, D. Dahnhardt, A. Stockl, O. T. Raitakari, M. Kahonen, A. Peters, T. Meitinger, K. Strauch, K. O.-S. Group, L. Kedenko, B. Paulweber, T. Lehtimaki, S. C. Hunt, P. Vollenweider, C. Lamina, and F. Kronenberg. 2017. A genome-wide association meta-analysis on lipoprotein (a) concentrations adjusted for apolipoprotein (a) isoforms. *J. Lipid Res.* **58**: 1834-1844.
7. Zekavat, S. M., S. Ruotsalainen, R. E. Handsaker, M. Alver, J. Bloom, T. Poterba, C. Seed, J. Ernst, M. Chaffin, J. Engreitz, G. M. Peloso, A. Manichaikul, C. Yang, K. A. Ryan, M. Fu, W. C. Johnson, M. Tsai, M. Budoff, V. S. Ramachandran, L. A. Cupples, J. I. Rotter, S. S. Rich, W. Post, B. D. Mitchell, A. Correa, A. Metspalu, J. G. Wilson, V. Salomaa, M. Kellis, M. J. Daly, B. M. Neale, S. McCarroll, I. Surakka, T. Esko, A. Ganna, S. Ripatti, S. Kathiresan, P. Natarajan, and N. T. L. W. Group. 2018. Deep coverage whole genome sequences and plasma lipoprotein(a) in individuals of European and African ancestries. *Nat Commun* **9**: 2606.

8. Burgess, S., B. A. Ference, J. R. Staley, D. F. Freitag, A. M. Mason, S. F. Nielsen, P. Willeit, R. Young, P. Surendran, S. Karthikeyan, T. R. Bolton, J. E. Peters, P. R. Kamstrup, A. Tybjaerg-Hansen, M. Benn, A. Langsted, P. Schnohr, S. Vedel-Krogh, C. J. Kobylecki, I. Ford, C. Packard, S. Trompet, J. W. Jukema, N. Sattar, E. Di Angelantonio, D. Saleheen, J. M. M. Howson, B. G. Nordestgaard, A. S. Butterworth, J. Danesh, C. European Prospective Investigation Into, and C. Nutrition-Cardiovascular Disease. 2018. Association of LPA Variants With Risk of Coronary Disease and the Implications for Lipoprotein(a)-Lowering Therapies: A Mendelian Randomization Analysis. *JAMA Cardiol* 3: 619-627.
9. Li, J., L. A. Lange, J. Sabourin, Q. Duan, W. Valdar, M. S. Willis, Y. Li, J. G. Wilson, and E. M. Lange. 2015. Genome- and exome-wide association study of serum lipoprotein (a) in the Jackson Heart Study. *J. Hum. Genet.* 60: 755-761.
